1 **Title: Attitudes toward COVID-19 pandemic among fully vaccinated individuals:**  
2 **evidence from Greece two years after the pandemic**

3 Running title: Attitudes toward COVID-19 pandemic

4

5 Petros Galanis\*, Clinical Epidemiology Laboratory, Faculty of Nursing, National and  
6 Kapodistrian University of Athens, Athens, Greece, [https://orcid.org/0000-0002-](https://orcid.org/0000-0002-1308-5782)  
7 1308-5782

8 Irene Vraka, Department of Radiology, P. & A. Kyriakou Children's Hospital,  
9 Athens, Greece

10 Aglaia Katsiroumpa, Clinical Epidemiology Laboratory, Faculty of Nursing, National  
11 and Kapodistrian University of Athens, Athens, Greece

12 Olga Siskou, Department of Tourism Studies, University of Piraeus, Piraeus, Greece

13 Olympia Konstantakopoulou, Center for Health Services Management and  
14 Evaluation, Faculty of Nursing, National and Kapodistrian University of Athens,  
15 Athens, Greece

16 Theodoros Katsoulas, Faculty of Nursing, National and Kapodistrian University of  
17 Athens, Athens, Greece

18 Theodoros Mariolis-Sapsakos, Faculty of Nursing, National and Kapodistrian  
19 University of Athens, Athens, Greece

20 Daphne Kaitelidou, Center for Health Services Management and Evaluation, Faculty  
21 of Nursing, National and Kapodistrian University of Athens, Athens, Greece

22

1 \* Corresponding author: Petros Galanis, Assistant Professor, Clinical Epidemiology  
2 Laboratory, Faculty of Nursing, National and Kapodistrian University of Athens, 123  
3 Papdiamantopoulou street, GR-11527, Athens, Greece, e-mail: [pegalan@nurs.uoa.gr](mailto:pegalan@nurs.uoa.gr),  
4 <https://orcid.org/0000-0002-1308-5782>

5

6 Conflicts of interest: none

7 Funding: None

8 Declarations of interest: None

9 Acknowledgments: None

10

11

1 **Abstract**

2 **Background:** Considering the major effects of COVID-19 pandemic on health,  
3 social, economic, and political dimensions of all countries, positive attitudes toward  
4 COVID-19 pandemic are essential to control the pandemic. In our study, we  
5 investigated attitudes toward COVID-19 pandemic among fully COVID-19  
6 vaccinated individuals two years after the pandemic and we identified predictors of  
7 attitudes.

8 **Materials and Methods:** We conducted an on-line cross-sectional study with 815  
9 fully COVID-19 vaccinated individuals in Greece during May 2022. A self-  
10 administered and valid questionnaire was disseminated through social media  
11 platforms. We measured socio-demographic variables and COVID-19-related  
12 variables as potential predictors of attitudes toward COVID-19 pandemic. The  
13 outcome variable was attitudes toward COVID-19 pandemic (compliance with  
14 hygiene measures, trust in COVID-19 vaccination, fear of COVID-19, and  
15 information regarding the COVID-19 pandemic and vaccination).

16 **Results:** We found a very high level of compliance with hygiene measures, a high  
17 level of trust and information about the COVID-19 pandemic and vaccination, and a  
18 moderate level of fear of COVID-19. Also, we identified that females, participants  
19 with a higher educational level, those with a chronic disease, those with a better self-  
20 perceived physical health, and those without a previous COVID-19 diagnosis adhered  
21 more in hygiene measures. Trust in COVID-19 vaccination was higher among  
22 females, older participants, those with a higher educational level, those with a better  
23 self-perceived physical health, and those without a previous COVID-19 diagnosis.  
24 Moreover, females, older participants, those with a higher educational level, those  
25 with a chronic disease, those with a better self-perceived physical health, those that  
26 received a flu vaccine in previous season, and those without a previous COVID-19  
27 diagnosis experienced more fear of the COVID-19. Finally, level of information

1 regarding COVID-19 pandemic and vaccination was higher for participants with a  
2 higher educational level, those without a chronic disease, those with a better self-  
3 perceived physical health, and those that received a flu vaccine in previous season.

4 **Conclusions:** Understanding predictors of attitudes toward COVID-19 pandemic  
5 among fully vaccinated individuals is crucial for developing appropriate public health  
6 campaigns in the future. Vaccination should be accompanied by positive attitudes in  
7 order to decrease the frequency of negative outcomes of COVID-19, such as  
8 hospitalization, complications and mortality.

9

10 **Keywords:** COVID-19; attitudes; vaccination; compliance; fear

11

1 **Attitudes toward COVID-19 pandemic among fully vaccinated individuals:**  
2 **evidence from Greece two years after the pandemic**

3

4 **Introduction**

5 COVID-19 pandemic is evolving and it is estimated that about 560 million people  
6 were infected with COVID-19 pandemic and about 6.3 million people have died until  
7 to date (13 July 2022) [1]. Breakthrough infections and new contagious variants of  
8 SARS-CoV-2 continue to threaten individuals even those that had completed the  
9 COVID-19 vaccine course [2, 3]. Considering the major effects of COVID-19  
10 pandemic on health, social, economic, and political dimensions of all countries,  
11 positive attitudes toward COVID-19 pandemic are essential to control the pandemic.  
12 Thus, understanding the attitudes of the general population and identifying potential  
13 predictors could help policy makers to achieve the outcomes of planned behavior [4, 5].  
14 A systematic review identified 43 studies worldwide that examined the attitudes of the  
15 individuals toward COVID-19 and all of them reported a positive attitude [6].

16 Positive attitudes such as adherence with COVID-19 public health guidelines are  
17 influenced by several factors, e.g. older age, female gender, trust in governments,  
18 information through traditional news media, and high self-perceived threaten of the  
19 COVID-19 [7]. Moreover, COVID-19 vaccination uptake is another important  
20 dimension of positive attitudes toward COVID-19 and the available evidence suggests  
21 that the vaccination rate is higher among males, white people, older people, those with  
22 higher socioeconomic status, those with a chronic condition, and those that are well  
23 informed about COVID-19 vaccines [8]. Positive attitudes toward COVID-19  
24 continue to be essential to curb COVID-19 infection rates and there is still interest in  
25 investigating potential predictors of these attitudes.

1 On March 2020, the Greek government announced the first lockdown in Greece due  
2 to the first confirmed COVID-19 cases in the country [9]. Two years later, Greece has  
3 been among countries with the highest mortality rates from COVID-19 worldwide  
4 with 2953 deaths per one million population [1]. Meanwhile, safe and effective  
5 COVID-19 vaccines [10, 11] were administrated by early 2021 in Greece.  
6 Considering that the rate of completed vaccinations in Greece is high and equal to the  
7 rate among countries in the European Union (73.6% vs. 73.3%) [12] the assessment of  
8 public attitudes toward COVID-19 pandemic could be critical predicting future  
9 attitudes toward COVID-19 vaccination and COVID-19 pandemic in general.

10 Thus, given the importance of the issue, we investigated attitudes toward COVID-19  
11 pandemic among fully COVID-19 vaccinated individuals in Greece two years after  
12 the pandemic and we identified predictors of attitudes.

13

## 14 **Methods**

### 15 **Study design**

16 We conducted a cross-sectional study in Greece during May 2022. We created an  
17 anonymous version of the study questionnaire in Greek using Google forms and we  
18 disseminated it through social media platforms. Thus, a convenience sample was  
19 obtained. Participation in the study was allowed for individuals aged 18 years or  
20 above that understand the Greek language and have completed the COVID-19 vaccine  
21 course (primary doses and booster dose). Participation in the study was anonymous  
22 and voluntary. Moreover, we followed the principles of the Declaration of Helsinki,  
23 while the study protocol was approved by the Ethics Committee of Department of  
24 Nursing, National and Kapodistrian University of Athens (reference number; 370, 02-  
25 09-2021).

### 26 **Predictor and outcome variables**

1 We measured socio-demographic variables and COVID-19-related variables as  
2 potential predictors of attitudes toward COVID-19 pandemic. In particular, we  
3 measured gender (male or female), age (continuous variable), marital status (single,  
4 married, divorced, or widow), educational level (elementary school, high school, or  
5 university degree), MSc/PhD degree (yes or no), chronic disease (yes or no), self-  
6 assessment of physical health (very poor, poor, moderate, good, or very good),  
7 influenza vaccination during 2021 (yes or no), previous COVID-19 diagnosis (yes or  
8 no), and COVID-19-related death in family members/friends (yes or no).

9 The outcome variable was attitudes toward COVID-19 pandemic and was measured  
10 with a valid questionnaire [13]. The questionnaire includes 16 items and four factors  
11 (compliance with hygiene measures, trust in COVID-19 vaccination, fear of COVID-  
12 19, and information regarding the COVID-19 pandemic and vaccination). Internal  
13 reliability of the questionnaire in our study was very good since Cronbach's  
14 coefficient alpha was 0.71 for the factor "compliance with hygiene measures", 0.78  
15 for the factor "trust in COVID-19 vaccination", 0.85 for the factor "fear of COVID-  
16 19", and 0.81 for the factor "information regarding the COVID-19 pandemic and  
17 vaccination". Responses for the 16 items range from 0 (totally disagree) to 10 (totally  
18 agree). Also, a total score from 0 to 10 is calculated for each factor. Higher values  
19 indicate higher level of compliance, trust, fear, and information.

## 20 **Statistical analysis**

21 We use absolute (n) and relative (%) frequencies to present categorical variables.  
22 Continuous variables are presented as mean, standard deviation, median, minimum  
23 value, and maximum value. The outcome variables were continuous variables that  
24 followed normal distribution. Therefore, we performed univariate and multivariable  
25 linear regression analysis to assess the impact of predictor variables on attitudes  
26 toward COVID-19 pandemic. We calculated unadjusted and adjusted coefficient beta  
27 for each predictor with corresponding 95% confidence intervals (CI) and p-values. A

1 p-value < 0.05 was considered statistically significant. Statistical analysis was  
2 performed with the Statistical Package for Social Sciences software (IBM Corp.  
3 Released 2012. IBM SPSS Statistics for Windows, Version 21.0. Armonk, NY: IBM  
4 Corp.).

5

## 6 **Results**

7 Socio-demographic characteristics and COVID-19-related characteristics of the  
8 participants are presented in Table 1. Mean age of 815 participants was 37 years,  
9 while 76.1% of them were females, 54% were singles, and 72.4% had a University  
10 degree. Moreover, 23.3% of the participants suffered from a chronic disease and  
11 82.4% of them considered their physical health as good/very good. Among the  
12 participants, 33.1% received a flu vaccine in previous season, 50.9% have been  
13 diagnosed with COVID-19 during the pandemic and 31.3% had family  
14 members/friends who had died because of COVID-19.

15 Descriptive statistics for the four factors of the questionnaire that we used to measure  
16 attitudes toward COVID-19 pandemic are shown in Table 2. Mean value on the factor  
17 “compliance with hygiene measures” was 9.0 indicating a very high level of  
18 compliance, while mean value on the factor “trust in COVID-19 vaccination” (7.0)  
19 denoted a high level of trust. Participants’ fear of the COVID-19 was moderate  
20 (mean=5.6), while the level of information about the COVID-19 pandemic and  
21 vaccination was high (mean=8.1).

22 Univariate and multivariable linear regression analysis with attitudes toward COVID-  
23 19 pandemic as the dependent variables are shown in Table 3 and 4. We found that  
24 females, married participants, those with a higher educational level, those with a  
25 chronic disease, those with a better self-perceived physical health, and those without a  
26 previous COVID-19 diagnosis adhered more in hygiene measures. Trust in COVID-



1 19 vaccination was higher among females, older participants, married participants,  
2 those with a higher educational level, those with a better self-perceived physical  
3 health, those without a previous COVID-19 diagnosis, and those without a COVID-  
4 19-related death in family members/friends. Moreover, females, older participants,  
5 married participants, those with a higher educational level, those with a chronic  
6 disease, those with a better self-perceived physical health, those that received a flu  
7 vaccine in previous season, and those without a previous COVID-19 diagnosis  
8 experienced more fear of the COVID-19. Finally, level of information regarding  
9 COVID-19 pandemic and vaccination was higher for participants with a higher  
10 educational level, those without a chronic disease, those with a better self-perceived  
11 physical health, those that received a flu vaccine in previous season, and those without  
12 a COVID-19-related death in family members/friends.

13

#### 14 **Discussion**

15 We conducted a cross-sectional study among fully COVID-19 vaccinated individuals  
16 in Greece in order to investigate their attitudes toward COVID-19 pandemic. To the  
17 best of our knowledge, this is the first study that examines this issue among fully  
18 COVID-19 vaccinated individuals. The study findings are extremely encouraging,  
19 since two years after the COVID-19 pandemic our participants expressed a very high  
20 level of compliance with hygiene measures and a high level of trust in COVID-19  
21 vaccination. Also, our results shown that the level of information about the COVID-  
22 19 pandemic and vaccination was high, while fear of the COVID-19 was moderate.  
23 Moreover, we identified several socio-demographic characteristics and COVID-19-  
24 related characteristics of the participants as predictors of attitudes toward COVID-19  
25 pandemic.

1 We found that compliance with hygiene measures was more prevalent in females.  
2 Available literature supports this finding [14–17] and could be explained by females’  
3 tendency to practice socially acceptable behavior [18, 19]. This finding is interesting  
4 since it is well known that COVID-19 mortality is higher for males compared to  
5 females [20, 21]. In our study increased educational level was associated with greater  
6 compliance with hygiene measures. This finding is confirmed by studies conducting  
7 both in the general population and healthcare workers [22, 23]. Similar studies  
8 regarding the swine influenza pandemic in Saudi Arabia and the severe acute  
9 respiratory syndrome in Hong Kong confirm the positive effect of education on public  
10 attitudes and practices [24, 25]. Higher educational level could help individuals to  
11 have a better understanding of the information with regards to the COVID-19  
12 pandemic. Therefore, people in a higher educational level could improve their  
13 knowledge and adopt positive preventive practices. Our results support the finding of  
14 the literature that chronic conditions are associated with higher level of compliance  
15 [26–28]. This finding is not surprising since it is well known that negative outcomes  
16 of COVID-19 (e.g. complications, hospitalization, and fatality) are more common  
17 among patients with chronic diseases (e.g. diabetes, hypertension, and respiratory  
18 chronic diseases) [29, 30]. Therefore, people with morbidities take more precautions  
19 in protecting themselves against COVID-19 compared to healthy people.

20 According to our results, level of trust in COVID-19 vaccination was higher among  
21 females, older participants, those with a higher educational level, those without a  
22 previous COVID-19 diagnosis, and those with better self-perceived physical health.  
23 These findings are confirmed by evidence since older age, higher socioeconomic  
24 status, and higher self-perceived COVID-19 vulnerability are the main predictors of  
25 COVID-19 vaccination uptake in the general population [8]. In addition, higher  
26 educational level and absence of COVID-19 infection have already proven to be  
27 independent predictors of COVID-19 vaccination uptake [31, 32]. Additional data  
28 from pregnant women reveal that uptake rate is higher among older women and

1 women without a previous COVID-19 diagnosis [33]. Moreover, two recent studies  
2 [34, 35] identified female gender as a predictor of individuals' willingness to accept a  
3 first COVID-19 booster dose, while another study [36] found that people with better  
4 self-perceived physical health and people without a previous COVID-19 diagnosis  
5 had higher odds of accepting a second booster dose.

6 In our study, females experienced more fear of COVID-19 than males. Several studies  
7 both in the general population and healthcare workers confirm that fear of COVID-19  
8 is higher in females [37–41]. In general, females experience the COVID-19 pandemic  
9 worse than males, since the prevalence of mood and anxiety disorders are higher in  
10 females than males [42, 43]. The relationship between gender and COVID-19  
11 experiences could be attributed to social, biological, and psychological differences  
12 between males and females. For instance, females tend to experience more anxiety  
13 and psychological distress than males [44]. Moreover, we found that level of fear of  
14 COVID-19 was higher among individuals with a chronic disease. This finding echoes  
15 the results of similar research which shows a positive relationship between morbidity  
16 and fear of COVID-19 [45–47]. Individuals with a chronic condition may be afraid of  
17 COVID-19 due to the established association between morbidity and COVID-19-  
18 related mortality [29, 30]. In a similar way, we found that increased age was  
19 associated with increased level of fear of COVID-19. A systematic review confirms  
20 the positive relationship between age and fear of COVID-19 [41]. It is reasonable  
21 older individuals to be more afraid of COVID-19 since older age is one of the main  
22 predictors of COVID-19-related mortality [48, 49]. In our study, the higher  
23 educational level was significantly associated with fear of COVID-19. The impact of  
24 education on fear is controversial since two studies [50, 51] in Peru and Iran found a  
25 positive relationship between age and fear, while two studies [52, 53] in China and  
26 Colombia found the opposite result. Interestingly, a large study with 14,558  
27 participants in 48 countries found that less educated participants experienced  
28 increased fear of COVID-19 [54]. Reduced access to health care services and

1 difficulties in understanding health promotion media messages [55] and weaker  
2 tendency to respond to health promotion media messages [56] could explain fear of  
3 people with lower education.

4 There is limited evidence regarding the factors that influence information in COVID-  
5 19 era since research until now has just focused on the information seeking and the  
6 sources of information. We found that level of information regarding COVID-19  
7 pandemic and vaccination was higher for participants with a higher educational level.  
8 COVID-19 pandemic affects more vulnerable populations such as less educated with  
9 worse health status [57]. A similar study [58] in China found that vulnerable groups  
10 (e.g. older, females, and unemployed) expressed more concerns about lack of timely  
11 information regarding COVID-19. Therefore, policy makers should provide these  
12 vulnerable groups with more adequate and timely information. On the other hand,  
13 individuals with a higher educational level have higher expectations for information  
14 disclosure since they are more eager to get full information regarding COVID-19  
15 pandemic [58]. Achieving a high level of information is essential to promote  
16 preventive behaviors against COVID-19 among the public since there is a direct  
17 relation between COVID-19 information and promotion of individual health [59, 60].

## 18 **Limitations**

19 Our study had several limitations. First, we used a convenience sample and  
20 participants were recruited through social media. Thus, our sample could not be  
21 representative of the general population of Greece and we cannot generalize our  
22 findings. Studies using nationally representative samples could add more information  
23 in this research topic. Also, we used a self-reported questionnaire to collect data that  
24 can be influenced by social desirability. Moreover, we investigated only a few socio-  
25 demographic characteristics and COVID-19-related characteristics as potential  
26 predictors of fear of attitudes toward COVID-19 pandemic. Therefore, future studies  
27 should expand research investigating other potential predictors, e.g. psychological

1 variables, personality characteristics, social media variables, information sources, etc.  
2 Finally, cross-sectional studies like our study could never establish a causal relation  
3 between independent variables and attitudes toward COVID-19 pandemic.

#### 4 **Conclusions**

5 Understanding predictors of attitudes toward COVID-19 pandemic among fully  
6 vaccinated individuals is crucial for developing appropriate public health campaigns  
7 in the future. Fully vaccinated people may be feel safe against COVID-19 adopting  
8 then less positive attitudes, e.g. less wearing of face masks and non adaptation of  
9 physical distancing. In addition, COVID-19-related deaths among fully vaccinated  
10 individuals are occurred since no vaccine could have perfect effectiveness. This fact  
11 could threaten public trust in COVID-19 vaccination, leading to disappointment and  
12 negative attitudes. Therefore, policy makers should always keep in mind fully  
13 vaccinated people in order to maintain or even improve positive attitudes toward  
14 COVID-19 pandemic in this group. Vaccination against COVID-19 is a tremendous  
15 weapon to control the pandemic but it is not the only one. Vaccination should be  
16 accompanied by positive attitudes toward COVID-19 pandemic in order to decrease  
17 transmission mode of the virus and frequency of negative outcomes of COVID-19,  
18 e.g. hospitalization and COVID-19-related deaths.

19

20

21

- 1 **Table 1.** Socio-demographic characteristics and COVID-19-related characteristics of
- 2 the participants.

| <b>Characteristics</b>   | <b>N</b> | <b>%</b> |
|--------------------------|----------|----------|
| Gender                   |          |          |
| Males                    | 195      | 23.9     |
| Females                  | 620      | 76.1     |
| Age (years) <sup>a</sup> | 37.0     | 13.3     |
| Marital status           |          |          |
| Singles                  | 440      | 54.0     |
| Married                  | 290      | 35.6     |
| Divorced                 | 75       | 9.2      |
| Widowed                  | 10       | 1.2      |
| Educational level        |          |          |
| Elementary school        | 0        | 0.0      |
| High school              | 225      | 27.6     |
| University degree        | 590      | 72.4     |
| MSc/PhD degree           |          |          |
| No                       | 330      | 40.5     |
| Yes                      | 485      | 59.5     |
| Chronic disease          |          |          |
| No                       | 625      | 76.7     |
| Yes                      | 190      | 23.3     |

|                                                  |     |      |
|--------------------------------------------------|-----|------|
| Self-perceived physical health                   |     |      |
| Very poor                                        | 0   | 0.0  |
| Poor                                             | 5   | 0.6  |
| Moderate                                         | 90  | 11.0 |
| Good                                             | 400 | 49.1 |
| Very good                                        | 320 | 39.3 |
| Influenza vaccination in previous season         |     |      |
| No                                               | 545 | 66.9 |
| Yes                                              | 270 | 33.1 |
| Previous COVID-19 diagnosis                      |     |      |
| No                                               | 400 | 49.1 |
| Yes                                              | 415 | 50.9 |
| COVID-19-related death in family members/friends |     |      |
| No                                               | 560 | 68.7 |
| Yes                                              | 255 | 31.3 |

1 <sup>a</sup> mean, standard deviation

2

- 1 **Table 2.** Descriptive statistics for the four factors that measure attitudes toward
- 2 COVID-19 pandemic.

| <b>Factors</b>                                              | <b>Mean</b> | <b>Standard deviation</b> | <b>Median</b> | <b>Minimum value</b> | <b>Maximum value</b> |
|-------------------------------------------------------------|-------------|---------------------------|---------------|----------------------|----------------------|
| Compliance with hygiene measures                            | 9.0         | 1.1                       | 9.5           | 4.5                  | 10                   |
| Trust in COVID-19 vaccination                               | 7.0         | 1.6                       | 7.1           | 2.4                  | 9.4                  |
| Fear of the COVID-19                                        | 5.6         | 2.0                       | 5.6           | 1.2                  | 9.6                  |
| Information regarding the COVID-19 pandemic and vaccination | 8.1         | 1.5                       | 8.0           | 3.0                  | 10.0                 |

3

4

5

6

7



- 1 **Table 3.** Univariate and multivariable linear regression analysis with individuals' compliance with hygiene measures and trust in COVID-19 vaccination as  
 2 the dependent variables.

| Predictor variables                                                         | Compliance with hygiene measures        |         |                                                    |         | Trust in COVID-19 vaccination           |         |                                                    |         |
|-----------------------------------------------------------------------------|-----------------------------------------|---------|----------------------------------------------------|---------|-----------------------------------------|---------|----------------------------------------------------|---------|
|                                                                             | Unadjusted coefficient<br>beta (95% CI) | P-value | Adjusted coefficient<br>beta (95% CI) <sup>a</sup> | P-value | Unadjusted coefficient<br>beta (95% CI) | P-value | Adjusted coefficient<br>beta (95% CI) <sup>b</sup> | P-value |
| Gender (females vs. males)                                                  | 0.47 (0.29 to 0.65)                     | <0.001  | 0.59 (0.41 to 0.76)                                | <0.001  | 0.26 (-0.002 to 0.52)                   | 0.05    | 0.48 (0.23 to 0.73)                                | <0.001  |
| Age (years)                                                                 | 0.02 (0.01 to 0.022)                    | <0.001  | 0.007 (0.0003 to 0.02)                             | 0.055   | 0.04 (0.03 to 0.05)                     | <0.001  | 0.03 (0.02 to 0.04)                                | <0.001  |
| Marital status (married vs. singles/widowed/divorced)                       | 0.41 (0.25 to 0.57)                     | <0.001  | 0.38 (0.21 to 0.55)                                | <0.001  | 0.78 (0.55 to 1.00)                     | <0.001  | 0.35 (0.10 to 0.59)                                | 0.005   |
| Educational level (university degree vs. high school)                       | 0.25 (0.08 to 0.42)                     | 0.004   | 0.23 (0.01 to 0.46)                                | 0.06    | 0.56 (0.31 to 0.80)                     | <0.001  | 0.41 (0.09 to 0.75)                                | 0.013   |
| MSc/PhD degree (yes vs. no)                                                 | 0.42 (0.27 to 0.57)                     | 0.001   | 0.41 (0.21 to 0.61)                                | <0.001  | 0.70 (0.48 to 0.92)                     | <0.001  | 0.60 (0.32 to 0.89)                                | <0.001  |
| Chronic disease (yes vs. no)                                                | 0.31 (0.13 to 0.49)                     | 0.001   | 0.31 (0.13 to 0.49)                                | 0.001   | 0.06 (-0.20 to 0.32)                    | 0.65    | 0.02 (-0.23 to 0.27)                               | 0.88    |
| Self-perceived physical health (good/very good vs. very poor/poor/moderate) | 0.13 (-0.11 to 0.37)                    | 0.28    | 0.39 (0.16 to 0.63)                                | 0.001   | 0.32 (-0.03 to 0.66)                    | 0.07    | 0.47 (0.14 to 0.80)                                | 0.005   |
| Influenza vaccination during 2021 (yes vs. no)                              | 0.25 (0.09 to 0.41)                     | 0.002   | 0.12 (-0.04 to 0.29)                               | 0.15    | -0.17 (-0.41 to 0.07)                   | 0.16    | 0.22 (-0.01 to 0.45)                               | 0.07    |

|                                                               |                        |       |                        |       |                       |      |                         |       |
|---------------------------------------------------------------|------------------------|-------|------------------------|-------|-----------------------|------|-------------------------|-------|
| no)                                                           |                        |       |                        |       |                       |      |                         |       |
| Previous COVID-19 diagnosis (yes vs. no)                      | -0.19 (-0.34 to -0.03) | 0.017 | -0.21 (-0.36 to -0.07) | 0.004 | 0.29 (-0.57 to 1.15)  | 0.51 | -0.36 (-0.56 to -0.15)  | 0.001 |
| COVID-19-related death in family members/friends (yes vs. no) | -0.09 (-0.26 to 0.07)  | 0.25  | -0.06 (-0.22 to 0.09)  | 0.44  | -0.17 (-0.41 to 0.07) | 0.16 | -0.23 (-0.45 to -0.003) | 0.047 |

1 A negative coefficient beta indicates a negative association, while a positive coefficient beta indicates a positive association.

2 CI: confidence interval

3 <sup>a</sup> R<sup>2</sup> for the final multivariable model was 13.2%

4 <sup>b</sup> R<sup>2</sup> for the final multivariable model was 17.8%

5

6

7

8

- 1 **Table 4.** Univariate and multivariable linear regression analysis with individuals' fear of COVID-19 and information regarding COVID-19 pandemic and
- 2 vaccination as the dependent variables.

| Predictor variables                                                         | Fear of COVID-19                        |         |                                                    |         | Information regarding COVID-19 pandemic and vaccination |         |                                                    |         |
|-----------------------------------------------------------------------------|-----------------------------------------|---------|----------------------------------------------------|---------|---------------------------------------------------------|---------|----------------------------------------------------|---------|
|                                                                             | Unadjusted coefficient<br>beta (95% CI) | P-value | Adjusted coefficient<br>beta (95% CI) <sup>a</sup> | P-value | Unadjusted coefficient<br>beta (95% CI)                 | P-value | Adjusted coefficient<br>beta (95% CI) <sup>b</sup> | P-value |
| Gender (females vs. males)                                                  | 0.12 (-0.20 to 0.44)                    | 0.45    | 0.43 (0.11 to 0.74)                                | 0.008   | -0.29 (-0.53 to -0.05)                                  | 0.017   | -0.17 (-0.41 to 0.07)                              | 0.17    |
| Age (years)                                                                 | 0.04 (0.03 to 0.05)                     | <0.001  | 0.01 (0.001 to 0.03)                               | 0.035   | 0.006 (-0.002 to 0.01)                                  | 0.13    | -0.004 (-0.01 to 0.005)                            | 0.37    |
| Marital status (married vs. singles/widowed/divorced)                       | 0.74 (0.46 to 1.02)                     | <0.001  | 0.41 (0.11 to 0.72)                                | 0.008   | 0.14 (-0.07 to 0.35)                                    | 0.19    | 0.03 (-0.20 to 0.26)                               | 0.80    |
| Educational level (university degree vs. high school)                       | 0.93 (0.63 to 1.22)                     | <0.001  | 0.46 (0.04 to 0.88)                                | 0.032   | 0.06 (0.17 to 0.28)                                     | 0.63    | 0.45 (0.13 to 0.77)                                | 0.006   |
| MSc/PhD degree (yes vs. no)                                                 | 0.73 (0.46 to 1.00)                     | <0.001  | 0.19 (-0.17 to 0.55)                               | 0.30    | 0.22 (0.02 to 0.43)                                     | 0.034   | 0.50 (0.23 to 0.78)                                | <0.001  |
| Chronic disease (yes vs. no)                                                | 0.39 (0.07 to 0.71)                     | 0.016   | 0.37 (0.05 to 0.69)                                | 0.022   | -0.51 (-0.75 to -0.23)                                  | <0.001  | -0.43 (-0.67 to -0.19)                             | 0.001   |
| Self-perceived physical health (good/very good vs. very poor/poor/moderate) | 0.15 (-0.27 to 0.58)                    | 0.47    | 0.43 (0.01 to 0.85)                                | 0.043   | 0.59 (0.27 to 0.90)                                     | <0.001  | 0.42 (0.09 to 0.74)                                | 0.011   |
| Influenza vaccination during 2021 (yes vs. no)                              | 0.79 (0.51 to 1.07)                     | <0.001  | 0.49 (0.20 to 0.79)                                | 0.001   | 0.67 (0.44 to 0.90)                                     | <0.001  | 0.77 (0.54 to 0.99)                                | <0.001  |

|                                                               |                        |        |                        |        |                        |       |                        |       |
|---------------------------------------------------------------|------------------------|--------|------------------------|--------|------------------------|-------|------------------------|-------|
| Previous COVID-19 diagnosis (yes vs. no)                      | -0.64 (-0.91 to -0.37) | <0.001 | -0.57 (-0.83 to -0.32) | <0.001 | -0.39 (-0.61 to -0.17) | 0.001 | -0.17 (-0.36 to 0.03)  | 0.09  |
| COVID-19-related death in family members/friends (yes vs. no) | 0.10 (-0.19 to 0.39)   | 0.50   | 0.02 (-0.27 to 0.30)   | 0.91   | -0.20 (-0.42 to 0.02)  | 0.08  | -0.24 (-0.46 to -0.03) | 0.028 |

1 A negative coefficient beta indicates a negative association, while a positive coefficient beta indicates a positive association.

2 CI: confidence interval

3 <sup>a</sup> R<sup>2</sup> for the final multivariable model was 12.0%

4 <sup>b</sup> R<sup>2</sup> for the final multivariable model was 10.3%

5

6

7

1 References

- 2 [1] *Worldometer*,  
3 <https://www.worldometers.info/coronavirus/?fbclid=IwAR3T5FX->  
4 [sv\\_X1GABioSDrcHEHSxg694\\_LZmDFQ3lFJjsBQQmiTemxcAow5k#countries](https://www.worldometers.info/coronavirus/?fbclid=IwAR3T5FX-sv_X1GABioSDrcHEHSxg694_LZmDFQ3lFJjsBQQmiTemxcAow5k#countries)  
5 (2022, accessed 13 July 2022).
- 6 [2] Chung H-Y, Jian M-J, Chang C-K, et al. Emergency SARS-CoV-2 Variants of  
7 Concern: Novel Multiplex Real-Time RT-PCR Assay for Rapid Detection and  
8 Surveillance. *Microbiol Spectr* 2022; 10: e0251321.
- 9 [3] Haque A, Pant AB. Mitigating Covid-19 in the face of emerging virus variants,  
10 breakthrough infections and vaccine hesitancy. *J Autoimmun* 2022; 127:  
11 102792.
- 12 [4] Wu Z, McGoogan JM. Characteristics of and Important Lessons From the  
13 Coronavirus Disease 2019 (COVID-19) Outbreak in China: Summary of a  
14 Report of 72 314 Cases From the Chinese Center for Disease Control and  
15 Prevention. *JAMA* 2020; 323: 1239.
- 16 [5] McEachan R, Taylor N, Harrison R, et al. Meta-Analysis of the Reasoned  
17 Action Approach (RAA) to Understanding Health Behaviors. *Ann Behav Med*  
18 2016; 50: 592–612.
- 19 [6] Saadatjoo S, Miri M, Hassanipour S, et al. Knowledge, attitudes, and practices  
20 of the general population about Coronavirus disease 2019 (COVID-19): a  
21 systematic review and meta-analysis with policy recommendations. *Public*  
22 *Health* 2021; 194: 185–195.
- 23 [7] Moran C, Campbell DJT, Campbell TS, et al. Predictors of attitudes and  
24 adherence to COVID-19 public health guidelines in Western countries: a rapid  
25 review of the emerging literature. *Journal of Public Health* 2021; 43: 739–753.

- 1 [8] Galanis P, Vraka I, Siskou O, et al. Predictors of COVID-19 vaccination uptake  
2 and reasons for decline of vaccination: a systematic review. *medrxiv*. Epub  
3 ahead of print 31 July 2021. DOI: 10.1101/2021.07.28.21261261.
- 4 [9]. *Wikipedia*, [https://en.wikipedia.org/wiki/COVID-19\\_pandemic\\_in\\_Greece](https://en.wikipedia.org/wiki/COVID-19_pandemic_in_Greece)  
5 (2022, accessed 13 July 2022).
- 6 [10] Fan Y-J, Chan K-H, Hung IF-N. Safety and Efficacy of COVID-19 Vaccines: A  
7 Systematic Review and Meta-Analysis of Different Vaccines at Phase 3.  
8 *Vaccines (Basel)* 2021; 9: 989.
- 9 [11] Pormohammad A, Zarei M, Ghorbani S, et al. Efficacy and Safety of COVID-  
10 19 Vaccines: A Systematic Review and Meta-Analysis of Randomized Clinical  
11 Trials. *Vaccines (Basel)* 2021; 9: 467.
- 12 [12]. *Covidvax.live*, <https://covidvax.live/location/grc> (2022, accessed 13 July 2022).
- 13 [13] Galanis P, Vraka I, Siskou O, et al. Development and validation of a  
14 questionnaire to measure attitudes toward COVID-19 vaccination and  
15 pandemic. *Int J Caring Sci* 2022; 15: 1–10.
- 16 [14] Nivette A, Ribeaud D, Murray A, et al. Non-compliance with COVID-19-  
17 related public health measures among young adults in Switzerland: Insights  
18 from a longitudinal cohort study. *Social Science & Medicine* 2021; 268:  
19 113370.
- 20 [15] Seale H, Heywood AE, Leask J, et al. COVID-19 is rapidly changing:  
21 Examining public perceptions and behaviors in response to this evolving  
22 pandemic. *PLoS ONE* 2020; 15: e0235112.
- 23 [16] Yousuf H, Corbin J, Sweep G, et al. Association of a Public Health Campaign  
24 About Coronavirus Disease 2019 Promoted by News Media and a Social

- 1 Influencer With Self-reported Personal Hygiene and Physical Distancing in the  
2 Netherlands. *JAMA Netw Open* 2020; 3: e2014323.
- 3 [17] Paramita W, Rostiani R, Winahjoe S, et al. Explaining the Voluntary  
4 Compliance to COVID-19 Measures: An Extrapolation on the Gender  
5 Perspective. *Glob J Flex Syst Manag* 2021; 22: 1–18.
- 6 [18] Suen LKP, So ZYY, Yeung SKW, et al. Epidemiological investigation on hand  
7 hygiene knowledge and behaviour: a cross-sectional study on gender disparity.  
8 *BMC Public Health* 2019; 19: 401.
- 9 [19] Johnson HD, Sholcosky D, Gabello K, et al. Sex Differences in Public  
10 Restroom Handwashing Behavior Associated with Visual Behavior Prompts.  
11 *Percept Mot Skills* 2003; 97: 805–810.
- 12 [20] Nguyen NT, Chinn J, De Ferrante M, et al. Male gender is a predictor of higher  
13 mortality in hospitalized adults with COVID-19. *PLoS One* 2021; 16:  
14 e0254066.
- 15 [21] Nielsen J, Nørgaard SK, Lanzieri G, et al. Sex-differences in COVID-19  
16 associated excess mortality is not exceptional for the COVID-19 pandemic. *Sci*  
17 *Rep* 2021; 11: 20815.
- 18 [22] Olum R, Chekwech G, Wekha G, et al. Coronavirus Disease-2019: Knowledge,  
19 Attitude, and Practices of Health Care Workers at Makerere University  
20 Teaching Hospitals, Uganda. *Front Public Health* 2020; 8: 181.
- 21 [23] Almutairi AF, BaniMustafa A, Alessa YM, et al. Public Trust and Compliance  
22 with the Precautionary Measures Against COVID-19 Employed by Authorities  
23 in Saudi Arabia. *Risk Manag Healthc Policy* 2020; 13: 753–760.

- 1 [24] Balkhy HH, Abolfotouh MA, Al-Hathloul RH, et al. Awareness, attitudes, and  
2 practices related to the swine influenza pandemic among the Saudi public. *BMC*  
3 *Infect Dis* 2010; 10: 42.
- 4 [25] Leung GM, Lam T-H, Ho L-M, et al. The impact of community psychological  
5 responses on outbreak control for severe acute respiratory syndrome in Hong  
6 Kong. *J Epidemiol Community Health* 2003; 57: 857–863.
- 7 [26] Silesh M, Demisse TL, Taye BT, et al. Compliance with COVID-19 Preventive  
8 Measures and Associated Factors Among Women Attending Antenatal Care at  
9 Public Health Facilities of Debre Berhan Town, Ethiopia. *RMHP* 2021; Volume  
10 14: 4561–4569.
- 11 [27] Wong EL-Y, Ho K-F, Dong D, et al. Compliance with Standard Precautions and  
12 Its Relationship with Views on Infection Control and Prevention Policy among  
13 Healthcare Workers during COVID-19 Pandemic. *Int J Environ Res Public*  
14 *Health* 2021; 18: 3420.
- 15 [28] Kumbeni MT, Apanga PA, Yeboah EO, et al. Knowledge and preventive  
16 practices towards COVID-19 among pregnant women seeking antenatal services  
17 in Northern Ghana. *PLoS ONE* 2021; 16: e0253446.
- 18 [29] Zhou F, Yu T, Du R, et al. Clinical course and risk factors for mortality of adult  
19 inpatients with COVID-19 in Wuhan, China: a retrospective cohort study. *The*  
20 *Lancet* 2020; 395: 1054–1062.
- 21 [30] Yang J, Zheng Y, Gou X, et al. Prevalence of comorbidities and its effects in  
22 patients infected with SARS-CoV-2: a systematic review and meta-analysis.  
23 *International Journal of Infectious Diseases* 2020; 94: 91–95.



- 1 [31] Martin CA, Patel P, Goss C, et al. Demographic and occupational determinants  
2 of anti-SARS-CoV-2 IgG seropositivity in hospital staff. *Journal of Public*  
3 *Health* 2022; 44: 234–245.
- 4 [32] Pacella-LaBarbara ML, Park YL, Patterson PD, et al. COVID-19 Vaccine  
5 Uptake and Intent Among Emergency Healthcare Workers: A Cross-Sectional  
6 Survey. *Journal of Occupational & Environmental Medicine* 2021; 63: 852–  
7 856.
- 8 [33] Galanis P, Vraka I, Siskou O, et al. Uptake of COVID-19 Vaccines among  
9 Pregnant Women: A Systematic Review and Meta-Analysis. *Vaccines* 2022; 10:  
10 766.
- 11 [34] Miao Y, Li Y, Zhang W, et al. The Psychological Experience of COVID-19  
12 Vaccination and Its Impact on the Willingness to Receive Booster Vaccines  
13 among the Chinese Population: Evidence from a National Cross-Sectional  
14 Study. *Int J Environ Res Public Health* 2022; 19: 5464.
- 15 [35] Rzymiski P, Poniedziałek B, Fal A. Willingness to Receive the Booster COVID-  
16 19 Vaccine Dose in Poland. *Vaccines (Basel)* 2021; 9: 1286.
- 17 [36] Galanis P, Vraka I, Katsiroumpa A, et al. Predictors of Willingness of the  
18 General Public to Receive a Second COVID-19 Booster Dose or a New  
19 COVID-19 Vaccine: A Cross-Sectional Study in Greece. *Vaccines* 2022; 10:  
20 1061.
- 21 [37] García-Reyna B, Castillo-García GD, Barbosa-Camacho FJ, et al. Fear of  
22 COVID-19 Scale for Hospital Staff in Regional Hospitals in Mexico: a Brief  
23 Report. *Int J Ment Health Addict* 2022; 20: 895–906.

- 1 [38] Galanis P, Petrogianni E, Vraka I, et al. Fear of COVID-19 among Nurses in  
2 Mobile COVID-19 Testing Units in Greece. *Int J Caring Sci* 2021; 14: 802–  
3 810.
- 4 [39] Patelarou E, Galanis P, Mechili EA, et al. Assessment of COVID-19 Fear in  
5 Five European Countries before Mass Vaccination and Key Predictors among  
6 Nurses and Nursing Students. *Vaccines* 2022; 10: 98.
- 7 [40] Sakib N, Akter T, Zohra F, et al. Fear of COVID-19 and Depression: A  
8 Comparative Study Among the General Population and Healthcare  
9 Professionals During COVID-19 Pandemic Crisis in Bangladesh. *Int J Ment*  
10 *Health Addiction*. Epub ahead of print 19 February 2021. DOI: 10.1007/s11469-  
11 020-00477-9.
- 12 [41] Luo F, Ghanei Gheshlagh R, Dalvand S, et al. Systematic Review and Meta-  
13 Analysis of Fear of COVID-19. *Front Psychol* 2021; 12: 661078.
- 14 [42] Rossi R, Socci V, Talevi D, et al. COVID-19 Pandemic and Lockdown  
15 Measures Impact on Mental Health Among the General Population in Italy.  
16 *Front Psychiatry* 2020; 11: 790.
- 17 [43] Tzur Bitan D, Grossman-Giron A, Bloch Y, et al. Fear of COVID-19 scale:  
18 Psychometric characteristics, reliability and validity in the Israeli population.  
19 *Psychiatry Research* 2020; 289: 113100.
- 20 [44] Casagrande M, Favieri F, Tambelli R, et al. The enemy who sealed the world:  
21 effects quarantine due to the COVID-19 on sleep quality, anxiety, and  
22 psychological distress in the Italian population. *Sleep Med* 2020; 75: 12–20.
- 23 [45] Aylie NS, Mekonen MA, Mekuria RM. The Psychological Impacts of COVID-  
24 19 Pandemic Among University Students in Bench-Sheko Zone, South-west

- 1 Ethiopia: A Community-based Cross-sectional Study. *Psychol Res Behav*  
2 *Manag* 2020; 13: 813–821.
- 3 [46] Kassir G, El Hayek S, Zalzale H, et al. Psychological distress experienced by  
4 self-quarantined undergraduate university students in Lebanon during the  
5 COVID-19 outbreak. *Int J Psychiatry Clin Pract* 2021; 25: 172–179.
- 6 [47] Zhan Y, Liu Y, Liu H, et al. Factors associated with insomnia among Chinese  
7 front-line nurses fighting against COVID-19 in Wuhan: A cross-sectional  
8 survey. *J Nurs Manag* 2020; 28: 1525–1535.
- 9 [48] Biswas M, Rahaman S, Biswas TK, et al. Association of Sex, Age, and  
10 Comorbidities with Mortality in COVID-19 Patients: A Systematic Review and  
11 Meta-Analysis. *Intervirolgy* 2020; 1–12.
- 12 [49] Tiruneh SA, Tesema ZT, Azanaw MM, et al. The effect of age on the incidence  
13 of COVID-19 complications: a systematic review and meta-analysis. *Syst Rev*  
14 2021; 10: 80.
- 15 [50] Sotomayor-Beltran C, Matta-Solis H, Perez-Siguas R, et al. Fear of COVID-19  
16 among Peruvian People Living in Disadvantaged Communities: A Cross-  
17 Sectional Study. *Clin Pract Epidemiol Ment Health* 2021; 17: 19–25.
- 18 [51] Zamanian M, Ahmadi D, Sindarreh S, et al. Fear and rumor associated with  
19 COVID-19 among Iranian adults, 2020. *J Educ Health Promot* 2020; 9: 355.
- 20 [52] Chen B, Sun X, Xie F, et al. Fear in the Chinese Population: Influential Patterns  
21 in the Early Stage of the COVID-19 Pandemic. *Front Psychol* 2021; 12:  
22 567364.

- 1 [53] Scoppetta O, Cassiani-Miranda CA, Arismendy-López YA, et al. Psychometric  
2 Properties of an Instrument to Assess the Fear of COVID-19 in a Sample in  
3 Argentina: a Mixed Approach. *Int J Ment Health Addict* 2022; 1–14.
- 4 [54] Sawicki AJ, Żemojtel-Piotrowska M, Balcerowska JM, et al. The fear of  
5 COVID-19 scale: Its structure and measurement invariance across 48 countries.  
6 *Psychol Assess* 2022; 34: 294–310.
- 7 [55] Oliver A. Equity of access to health care: outlining the foundations for action.  
8 *Journal of Epidemiology & Community Health* 2004; 58: 655–658.
- 9 [56] Iversen MM, Norekvål TM, Oterhals K, et al. Psychometric Properties of the  
10 Norwegian Version of the Fear of COVID-19 Scale. *Int J Ment Health*  
11 *Addiction* 2022; 20: 1446–1464.
- 12 [57] Egede LE, Ruggiero KJ, Frueh BC. Ensuring mental health access for  
13 vulnerable populations in COVID era. *Journal of Psychiatric Research* 2020;  
14 129: 147–148.
- 15 [58] Yang T, Shen X, Yang Y, et al. Timeliness of information disclosure during the  
16 low transmission period of COVID-19: resident-level observational study in  
17 China. *BMC Public Health* 2022; 22: 415.
- 18 [59] Li X, Liu Q. Social Media Use, eHealth Literacy, Disease Knowledge, and  
19 Preventive Behaviors in the COVID-19 Pandemic: Cross-Sectional Study on  
20 Chinese Netizens. *J Med Internet Res* 2020; 22: e19684.
- 21 [60] Liu PL. COVID-19 information on social media and preventive behaviors:  
22 Managing the pandemic through personal responsibility. *Soc Sci Med* 2021;  
23 277: 113928.
